# Supplementary material
Source: HighWire-hosted journal article supplement (https://heart.bmj.com/content/103/10/766)

Appendix Figure 1 - Study Flow Diagram

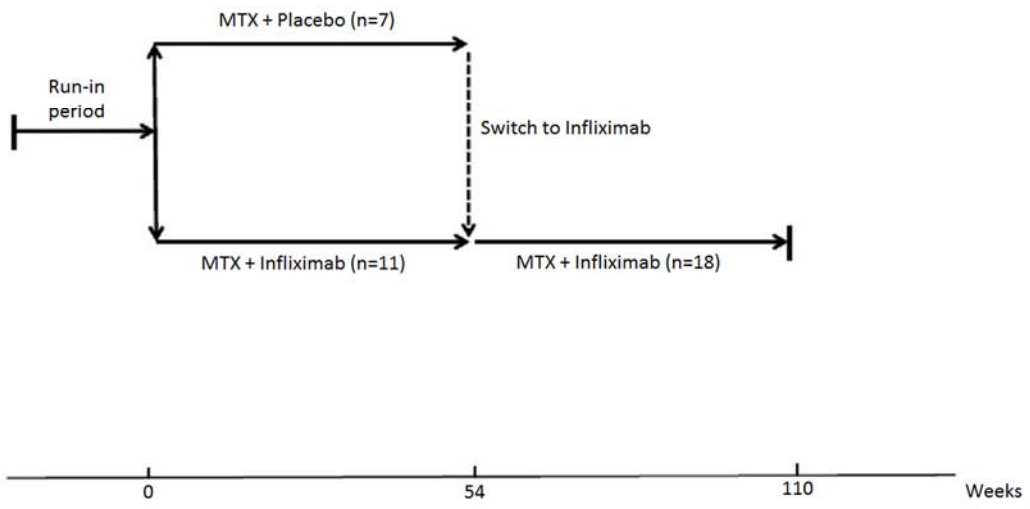

Supplement: inline-supplementary-material-1 [file inline-supplementary-material-1.pdf]
